# Supplementary material
Source: HighWire-hosted journal article supplement (https://ijgc.bmj.com/content/33/5/649)
Supplement: inline-supplementary-material-1 [file inline-supplementary-material-1.pdf]

## APPENDIX 2. LIST OF THE 155 EXTERNAL REVIEWERS

**Jafaru Abu**, gynaecological oncologist (United Kingdom); **Jasimu Umar Adoke**, pathologist (Nigeria); **Hoda Al-boo**, clinical oncologist (United Kingdom); **Giovanni Aletti**, gynaecological oncologist (Italy); **Roberto Altamirano**, gynaecological oncologist (Chile); **Igor Aluloski**, gynaecological oncologist (Republic of North Macedonia); **Frédéric Amant**, gynaecological oncologist (Belgium); **Beatrice Anghel**, radiation oncologist (Romania); **Maarit Anttila**, gynaecological oncologist (Finland); **Ali Ayhan**, gynaecological oncologist (Turkey); **Paloma Badía Agustí**, gynaecological oncologist (Spain); **Elena Bakhidze**, gynaecological oncologist (Russia); **Joost Bart**, pathologist (Netherlands); **Anne-Sophie Bats**, gynaecological oncologist (France); **Mario Beiner**, gynaecological oncologist (Israel); **Virginia Benito**, gynaecological oncologist (Spain); **Kamil Biringer**, obstetrician gynaecologist (Slovakia); **Mazen Bishtawi**, gynaecological oncologist (Qatar); **Nicolò Bizzarri**, gynaecological oncologist (Italy); **Tatjana Bozanovic**, gynaecological oncologist (Serbia); **Kjersti Bruheim**, clinical oncologist (Norway); **Ewa Burchardt**, radiation oncologist (Poland); **Marta Caretto**, gynaecological oncologist (Italy); **Supriya Chopra**, radiation oncologist (India); **Nicoletta Colombo**, gynaecological oncologist (Italy); **Nicole Concini**, gynaecological oncologist (Austria); **Abel Cordoba**, radiation oncologist (France); **Sofia Córdoba Largo**, radiation oncologist (Spain); **Stefanie Corradini**, radiation oncologist (Germany); **Sabrina Croce**, pathologist (France); **Branko Cvjetičanin**, gynaecologist (Slovenia); **Alessandro D'Amuri**, pathologist (Italy); **Ademi Dafina**, clinical oncologist (Kosovo); **Kreshnike Dedushi-Hoti**, radiologist (Kosovo); **Anne De Middelaer**, patient (Belgium); **Vitaliana De Sanctis**, radiation oncologist (Italy); **Kalyan Dhar**, gynaecological oncologist (United Kingdom); **Antonino Ditto**, gynaecological oncologist (Italy); **Beth Erickson**, radiation oncologist (United States of America); **Brynhildur Eyjolfsdottir**, gynaecological oncologist (Norway); **Anna Fagotti**, gynaecological oncologist (Italy); **Hemrik Falconer**, gynaecological oncologist (Sweden); **Daniela Fanni**, pathologist (Italy); **Angelica Viviana Fletcher**, gynaecological oncologist (Colombia); **Christina Fotopoulou**, gynaecological oncologist (United Kingdom); **Cristina Frutuoso**, gynaecological oncologist (Portugal); **Prafull Ghatage**, gynaecological oncologist (Canada); **Antonio Gil-Moreno**, gynaecological oncologist (Spain); **Frédéric Goffin**, gynaecological oncologist (Belgium); **Francois Golfier**, obstetrician gynaecologist (France); **Mikel Gorostidi**, obstetrician gynaecologist (Spain); **Deborah Gregory**, clinical oncologist (United Kingdom); **Benedetta Guani**, gynaecologist (Switzerland); **Emons Günter**, gynaecological oncologist (Germany); **Frédéric Guyon**, gynaecological oncologist (France); **David Hardisson**, pathologist (Spain); **Annette Hasenburg**, obstetrician gynaecologist (Germany); **Kristina Hellman**, medical oncologist (Sweden); **Gines Hernandez-Cortes**, obstetrician gynaecologist (Spain); **Antonio Herreros**, medical oncologist (Spain); **Peter Hoskin**, clinical oncologist (United Kingdom); **Kim Hulscher**, patient (Netherlands); **Vlora Ibishi**, gynaecologist (Kosovo); **Ahmet Cem Iyibozkurt**, gynaecological oncologist (Turkey); **Nina Boje Kibsgaard Jensen**, clinical oncologist (Denmark); **Kate Johnson**, radiation oncologist (Canada); **Ina Jurgenliemk-Schulz**, radiation oncologist (Netherlands); **Ioannis Kalogiannidis**, gynaecological oncologist (Greece); **Vesna Kesic**, gynaecological oncologist (Serbia); **Pearly Khaw**, radiation oncologist (Australia); **Gurkan Kiran**, gynaecological oncologist (Turkey); **Kathrin Kirchheiner**, radiation oncologist (Austria); **Christian Kirisits**, radiation oncologist (Austria); **Manon Kissel**, radiation oncologist (France); **Marko Klarić**, gynaecological oncologist (Croatia); **Roman Kocian**, gynaecological oncologist (Czech Republic); **Gunnar Kristensen**, gynaecological oncologist (Norway); **Kersti Kukk**, gynaecological oncologist (Estonia); **Valentina Lancellotta**, radiation oncologist (Italy); **Fabio Landoni**, gynaecologist (Italy); **Gabriel Lindahl**, gynaecological oncologist (Sweden); **Kristina Loessl**, radiation oncologist (Switzerland); **Tiziano Maggino**, gynaecological oncologist (Italy); **Katarina Majercakova**, radiation oncologist (Spain); **Saadia Mameri**, pathologist (Algeria); **Aljosa Mandic**, gynaecological oncologist (Serbia); **Suzana Manxhuka-Kerliu**, pathologist (Kosovo); **Bogdan Margineanu**, obstetrician gynaecologist (France); **Fabio Martinelli**, gynaecological oncologist (Italy); **Claudia Mateoiu**, pathologist (Sweden); **Xavier Matias-Guiu**, pathologist (Spain); **Mihai Meirovitz**, gynaecological oncologist (Israel); **Eva Meixner**, radiation oncologist (Germany); **Lucas Mendez**, radiation oncologist (Canada); **Miloš Mlynček**, gynaecological oncologist (Slovakia); **David Alejandro Morales Fernandez**, gynaecological

oncologist (Colombia); **Philippe Morice**, gynaecological oncologist (France); **Esten Nakken**, radiation oncologist (Norway); **Peter Niehoff**, radiation oncologist (Germany); **Eva-Maria Niine-Roolaht**, oncological gynaecologist (Estonia); **Krzysztof Nowosielski**, gynaecological oncologist (Poland); **Ernst Oberlechner**, gynaecological oncologist (Germany); **Claudia Ordeanu**, radiation oncologist (Romania); **Coza Ovidiu Florin**, radiation oncologist (Romania); **Saulius Paskauskas**, gynaecological oncologist (Lithuania); **Anna Myriam Perrone**, gynaecological oncologist (Italy); **Elisabetta Perrucci**, radiation oncologist (Italy); **Patrick Petignat**, obstetrician gynaecologist (Switzerland); **Stamatios Petousis**, gynaecological oncologist (Greece); **Primoz Petric**, radiation oncologist (Switzerland); **Bradley Pieters**, radiation oncologist (Netherlands); **Radovan Pilka**, obstetrician gynaecologist (Czech Republic); **Richard Poetter**, radiation oncologist (Austria); **Mario Preti**, gynaecologist (Italy); **Anna Protasova**, gynaecological oncologist (Russia); **Isabelle Ray-Coquard**, medical oncologist (France); **Nicholas Reed**, clinical oncologist (United Kingdom); **Alexander Reinthaller**, gynaecological oncologist (Austria); **Sophie Renard**, radiation oncologist (France); **Ángeles Rovirosa**, radiation oncologist (Spain); **Vilius Rudaitis**, gynaecological oncologist (Lithuania); **Giovanni Scambia**, gynaecological oncologist (Italy); **Sergio Schettini**, gynaecologist (Italy); **Jalid Sehoul**, gynaecological oncologist (Germany); **Cristiana Sessa**, gynaecological oncologist (Switzerland); **Paul Sevelde**, gynaecological oncologist (Austria); **Philippe Simon**, gynaecological oncologist (Belgium); **Tayup Simsek**, gynaecological oncologist (Turkey); **Piero Sismondi**, obstetrician gynaecologist (Italy); **Tone Skeie-Jensen**, gynaecological oncologist (Norway); **Špela Smrkolj**, gynaecological oncologist (Slovenia); **Erik Soegaard-Andersen**, obstetrician gynaecologist (Denmark); **Sofia Spampinato**, medical physics (Denmark); **Hana Stankusova**, radiation oncologist (Czech Republic); **Simona Stolnicu**, pathologist (Romania); **Eva-Maria Strömsholm**, patient (Finland); **Alina Sturdza**, radiation oncologist (Austria); **Sudha Sundar**, gynaecological oncologist (United Kingdom); **Jacek Jan Sznurkowski**, gynaecological oncologist (Poland); **Li Tee Tan**, clinical oncologist (United Kingdom); **Ekkasit Tharavichitkul**, radiation oncologist (Thailand); **Tayfun Toptas**, gynaecological oncologist (Turkey); **Antonio Travaglino**, pathologist (Italy); **Helen Trihia**, pathologist (Greece); **Elena Ulrikh**, gynaecological oncologist (Russia); **Margit Valgma**, radiation oncologist (Estonia); **Jacobusvan der Velden**, gynaecological oncologist (Netherlands); **Ignace Vergote**, gynaecological oncologist (Belgium); **René Verheijen**, gynaecological oncologist (France); **Lisa Vicenzi**, radiation oncologist (Italy); **Nadia Villena Salinas**, pathologist (Denmark); **Boris Vranes**, gynaecological oncologist (Serbia); **Henrike Westerveld**, radiation oncologist (Netherlands); **Nuri Yildirim**, gynaecological oncologist (Turkey); **Gian Franco Zannoni**, pathologist (Italy).
